# Supplementary material for: Intratumoral Gene Electrotransfer of Plasmid DNA Encoding shRNA against Melanoma Cell Adhesion Molecule Radiosensitizes Tumors by Antivascular Effects and Activation of an Immune Response
Source: PubMed Central journal article supplement (PMC7157247; doi:10.3390/vaccines8010135), 2020-03-19
Supplement: vaccines-08-00135-s001.pdf [file vaccines-08-00135-s001.pdf]

*Supplementary Material*
**Table 1.** Radiosensitization of B16F10 melanoma and TS/A carcinoma cells after MCAM silencing.

| Group           | B16F10 cells          |      | TS/A cells            |      |
|-----------------|-----------------------|------|-----------------------|------|
|                 | IC <sub>90</sub> (Gy) | EF   | IC <sub>90</sub> (Gy) | EF   |
| IR              | 6.11                  |      | 7.78                  |      |
| pControl+IR     | 5.09                  | 1.20 | 5.78                  | 1.35 |
| pMCAM+IR        | 4.96                  | 1.23 | 5.77                  | 1.35 |
| ER+IR           | 4.93                  | 1.24 | 6.42                  | 1.21 |
| GET pControl+IR | 4.71                  | 1.30 | 4.74                  | 1.64 |
| GET pMCAM+IR    | 3.89                  | 1.57 | 4.53                  | 1.72 |

IC<sub>90</sub>- a dose of irradiation (IR) that reduced survival of cells to 10%; EF- enhancement factor calculated by dividing of IC<sub>90</sub> value of IR group with a group of combined treatments with IR.
